# Supplementary material for: Interactive Media-Based Approach for an Exception From Informed Consent Trial Involving Patients With Trauma
Source: PubMed Central journal article supplement (PMC11223059; doi:10.1001/jamasurg.2024.2147), 2024-07-03

## Supplementary Online Content

Stephens SW, Carroll-Ledbetter C, Duckert S, et al; for the TAP Study Group. Interactive media-based approach for an Exception From Informed Consent trial involving patients with trauma. *JAMA Surg*. Published online July 3, 2024. doi:10.1001/jamasurg.2024.2147

### **eFigure.** Web Page Views

This supplemental material has been provided by the authors to give readers additional information about their work.

eFigure 1. Web page views

A. Main Landing page

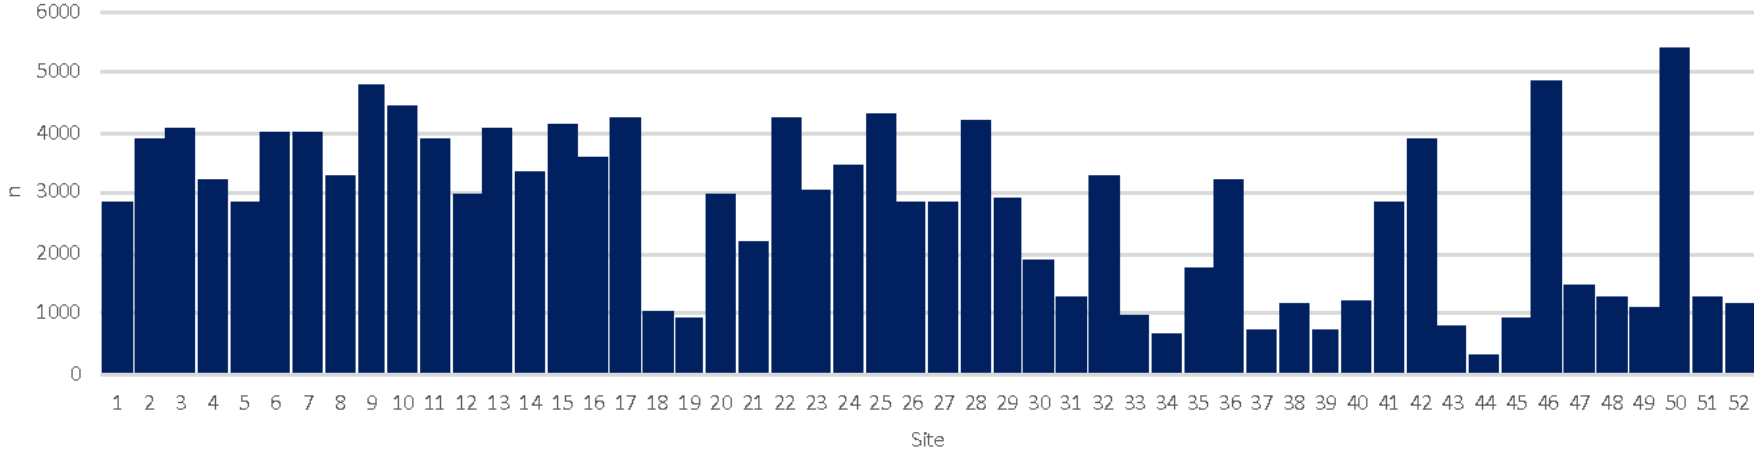

B. FAQ page

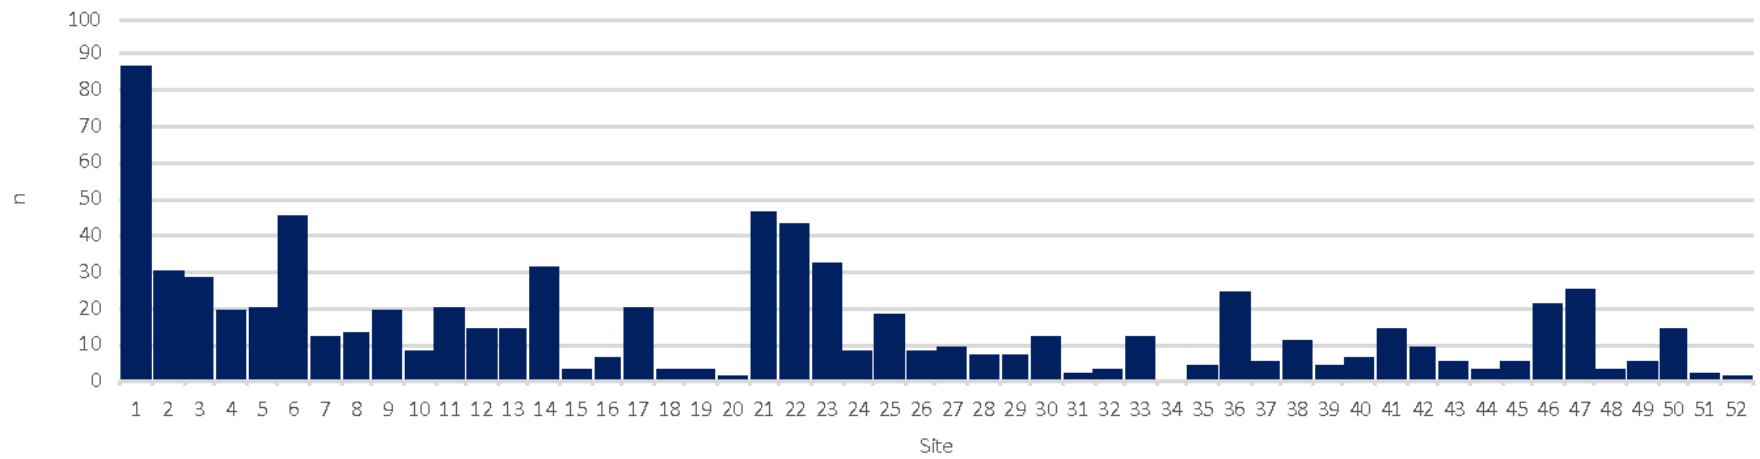

### C. EFIC page

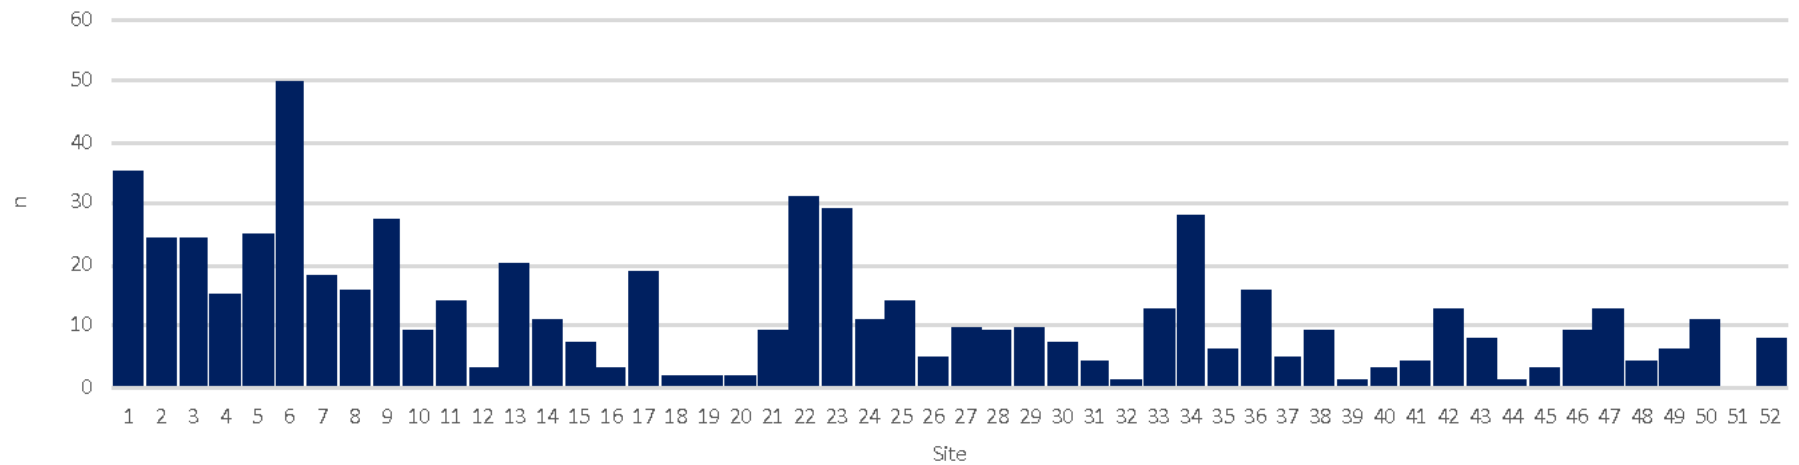

### D. Opt out page

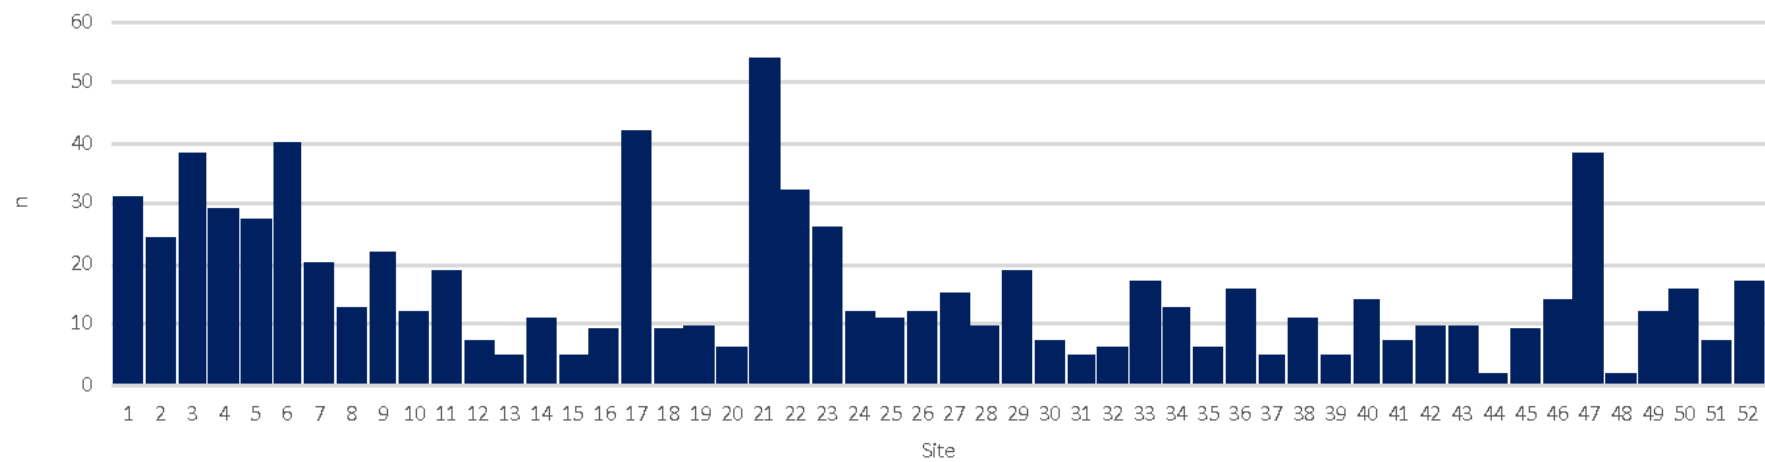

Supplement: jamasurg-e242147-s001.pdf [file jamasurg-e242147-s001.pdf]
