# Supplementary material for: Interactive Media-Based Approach for an Exception From Informed Consent Trial Involving Patients With Trauma
Source: PubMed Central journal article supplement (PMC11223059; doi:10.1001/jamasurg.2024.2147), 2024-07-03
Supplement: jamasurg-e242147-s002.pdf [file jamasurg-e242147-s002.pdf]

\*Indicates required information. Only first name, last name, and suffix will appear in PubMed.

| <b>*Group Name(s): TAP Investigators</b> |                   |                              |                  |                                                               |                                          |                                                         |                                                                                            |
|------------------------------------------|-------------------|------------------------------|------------------|---------------------------------------------------------------|------------------------------------------|---------------------------------------------------------|--------------------------------------------------------------------------------------------|
| <b>*First Name and Middle Initial(s)</b> | <b>*Last Name</b> | <b>*Suffix (eg, Jr, III)</b> | Academic Degrees | Institution                                                   | Location (city, state/province, country) | Role or Contribution, eg, chair, principal investigator | Group (if more than 1 Group listed in the byline) and/or Subgroup (eg, Steering Committee) |
| Amer A.                                  | Afaneh            |                              | MD, FACS         | Mercy St. Vincent Medical Center                              | Toledo, OH                               | Principal Investigator                                  | N/A                                                                                        |
| Suresh                                   | Agarwal           |                              | MD, FACS         | Duke University                                               | Durham, NC                               | Principal Investigator                                  | N/A                                                                                        |
| Tanya                                    | Anand             |                              | MD, MPH          | University of Arizona                                         | Tucson, AZ                               | Principal Investigator                                  | N/A                                                                                        |
| Jeffrey H.                               | Anderson          |                              | MD               | Temple University Hospital                                    | Philadelphia, PA                         | Principal Investigator                                  | N/A                                                                                        |
| Saman                                    | Arbabi            |                              | MD               | Harborview Medical Center                                     | Seattle, WA                              | Principal Investigator                                  | N/A                                                                                        |
| Dennis W.                                | Ashley            |                              | MD               | Atrium Health Navicent-Mercer University School of Medicine   | Macon, GA                                | Principal Investigator                                  | N/A                                                                                        |
| James                                    | Bardes            |                              | MD               | West Virginia University                                      | Morgantown, WV                           | Principal Investigator                                  | N/A                                                                                        |
| Elizabeth R.                             | Benjamin          |                              | MD,PHD,F ACS     | Grady Memorial Hospital - Emory School of Medicine            | Atlanta,GA                               | Principal Investigator                                  | N/A                                                                                        |
| Paul M.                                  | Bjordahl          |                              | MD FACS          | Sanford USD Medical Center                                    | Sioux Falls, SD                          | Principal Investigator                                  | N/A                                                                                        |
| Grant V.                                 | Bochicchio        |                              | MD,MPH, FACS     | Washington University in St Louis School of Medicine          | St. Louis, MO                            | Principal Investigator                                  | N/A                                                                                        |
| Nikolay                                  | Bugaev            |                              | MD               | Tufts Medical Center                                          | Boston, MA                               | Principal Investigator                                  | N/A                                                                                        |
| Charles C                                | Butts             |                              | MD, FACS         | University of South Alabama                                   | Mobile, AL                               | Principal Investigator                                  | N/A                                                                                        |
| Jeremy W.                                | Cannon            |                              | MD, SM           | Perelman School of Medicine at the University of Pennsylvania | Philadelphia, PA                         | Principal Investigator                                  | N/A                                                                                        |
| Margo                                    | Carlin            |                              | DO               | Texas Tech University Health Sciences Center                  | El Paso, TX                              | Principal Investigator                                  | N/A                                                                                        |

## Supplemental Online Content: Nonauthor Collaborators

\*Indicates required information. Only first name, last name, and suffix will appear in PubMed.

| *First Name and Middle Initial(s) | *Last Name | *Suffix (eg, Jr, III) | Academic Degrees    | Institution                                                  | Location (city, state/province, country) | Role or Contribution, eg, chair, principal investigator | Group (if more than 1 Group listed in the byline) and/or Subgroup (eg, Steering Committee) |
|-----------------------------------|------------|-----------------------|---------------------|--------------------------------------------------------------|------------------------------------------|---------------------------------------------------------|--------------------------------------------------------------------------------------------|
| Jeffrey A                         | Claridge   |                       | MD                  | Metro Health Medical Center, Case Western Reserve University | Cleveland, OH                            | Principal Investigator                                  | N/A                                                                                        |
| Raul                              | Coimbra    |                       | MD, PHD             | Riverside University Health Sytsem                           | Moreno Valley, CA                        | Principal Investigator                                  | N/A                                                                                        |
| Daniel B                          | Cox        |                       | MD                  | University of Alabama at Birmingham                          | Birmingham, AL                           | Principal Investigator                                  | N/A                                                                                        |
| Alisa                             | Cross      |                       | MD                  | University of Oklahoma Health Science Center                 | Oklahoma City, OK                        | Principal Investigator                                  | N/A                                                                                        |
| Warren C                          | Dorlac     |                       | MD                  | Medical Center of the Rockies                                | Loveland, CO                             | Principal Investigator                                  | N/A                                                                                        |
| Brian E.                          | Driver     |                       | MD                  | Hennepin County Medical Center                               | Minneapolis, MN                          | Principal Investigator                                  | N/A                                                                                        |
| Joseph                            | Dubose     |                       | MD                  | University of Texas at Austin Dell Medical School            | Austin, TX                               | Principal Investigator                                  | N/A                                                                                        |
| Raj R.                            | Gandhi     |                       | MD, PhD, FACS, FCCM | Burnett School of Medicine at TCU                            | Fort Worth, TX                           | Principal Investigator                                  | N/A                                                                                        |
| Richard                           | George     |                       | MD                  | Summa Health                                                 | Akron, OH                                | Principal Investigator                                  | N/A                                                                                        |
| Michael D.                        | Goodman    |                       | MD                  | University of Cincinnati                                     | Cincinnati, OH                           | Principal Investigator                                  | N/A                                                                                        |
| Jason                             | Hoth       |                       | MD                  | Wake Forest School of Medicine                               | Winston Salem, NC                        | Principal Investigator                                  | N/A                                                                                        |
| Charles                           | Hu         |                       | MD                  | Chandler Regional Medical Center                             | Chandler, AZ                             | Principal Investigator                                  | N/A                                                                                        |
| Uroghupatei P.                    | Iyegha     |                       | MD, FACS            | Regions Hospital                                             | St. Paul, MN                             | Principal Investigator                                  | N/A                                                                                        |
| Lewis E.                          | Jacobson   |                       | MB, ChB             | Ascension St. Vincent Indianapolis                           | Indianapolis, IN                         | Principal Investigator                                  | N/A                                                                                        |

## Supplemental Online Content: Nonauthor Collaborators

\*Indicates required information. Only first name, last name, and suffix will appear in PubMed.

| <b>*First Name and Middle Initial(s)</b> | <b>*Last Name</b> | <b>*Suffix (eg, Jr, III)</b> | Academic Degrees | Institution                                                                                     | Location (city, state/province, country) | Role or Contribution, eg, chair, principal investigator | Group (if more than 1 Group listed in the byline) and/or Subgroup (eg, Steering Committee) |
|------------------------------------------|-------------------|------------------------------|------------------|-------------------------------------------------------------------------------------------------|------------------------------------------|---------------------------------------------------------|--------------------------------------------------------------------------------------------|
| Donald H.                                | Jenkins           |                              | MD               | UT Health San Antonio                                                                           | San Antonio, TX                          | Principal Investigator                                  | N/A                                                                                        |
| Kyle J.                                  | Kalkwarf          |                              | MD               | University of Arkansas for Medical Sciences                                                     | Little Rock, AK                          | Principal Investigator                                  | N/A                                                                                        |
| John P.                                  | Kepros            |                              | MD               | Honor Health                                                                                    | Scottsdale, AZ                           | Principal Investigator                                  | N/A                                                                                        |
| Matthew E.                               | Kutcher           |                              | MD,MS            | University of Mississippi Medical Center                                                        | Jackson, MS                              | Principal Investigator                                  | N/A                                                                                        |
| Christine M.                             | Leeper            |                              | MD,MS            | University of Pittsburgh                                                                        | Pittsburgh, PA                           | Principal Investigator                                  | N/A                                                                                        |
| Stephanie N.                             | Lueckel           |                              | MD,ScM           | Rhode Island Hospital, Warren Alpert Medical School at Brown University                         | Providence, RI                           | Principal Investigator                                  | N/A                                                                                        |
| David A.                                 | Machado-Aranda    |                              | MD               | Ronald Reagan – UCLA Medical Center (also University of California, Los Angeles can be suffice) | Los Angeles, California                  | Principal Investigator                                  | N/A                                                                                        |
| Sarah D.                                 | Majercik          |                              | MD, MBA          | Intermountain Medical Center                                                                    | Salt Lake City, UT                       | Principal Investigator                                  | N/A                                                                                        |
| Adrian A.                                | Maung             |                              | MD               | Yale School of Medicine                                                                         | New Haven, CT                            | Principal Investigator                                  | N/A                                                                                        |
| Katherine E.                             | McKenzie          |                              | DO               | Jamaica Hospital Medical Center                                                                 | Queens, NY                               | Principal Investigator                                  | N/A                                                                                        |
| Jonathan P.                              | Meizoso           |                              | MD, MSPH, FACS   | University of Miami Miller School of Medicine, Ryder Trauma Center, Jackson Memorial Hospital   | Miami, FL                                | Principal Investigator                                  | N/A                                                                                        |
| Jeffry                                   | Nahmias           |                              | MD, MHPE         | University of California                                                                        | Orange, CA                               | Principal Investigator                                  | N/A                                                                                        |

## Supplemental Online Content: Nonauthor Collaborators

\*Indicates required information. Only first name, last name, and suffix will appear in PubMed.

| *First Name and Middle Initial(s) | *Last Name | *Suffix (eg, Jr, III) | Academic Degrees  | Institution                                     | Location (city, state/province, country) | Role or Contribution, eg, chair, principal investigator | Group (if more than 1 Group listed in the byline) and/or Subgroup (eg, Steering Committee) |
|-----------------------------------|------------|-----------------------|-------------------|-------------------------------------------------|------------------------------------------|---------------------------------------------------------|--------------------------------------------------------------------------------------------|
| Terence                           | O'Keeffe   |                       | MB,ChB,B Sc, MsPH | Augusta University                              | Augusta, GA                              | Principal Investigator                                  | N/A                                                                                        |
| Yuri                              | Rojavin    |                       | MD                | Capital Health                                  | Trenton, NJ                              | Principal Investigator                                  | N/A                                                                                        |
| Samuel W                          | Ross       |                       | MD                | Atrium Health - Carolinas Medical Center        | Charlotte, NC                            | Principal Investigator                                  | N/A                                                                                        |
| Navdeep S.                        | Samra      |                       | MD                | Louisiana State University Health Shreveport    | Shreveport, LA                           | Principal Investigator                                  | N/A                                                                                        |
| Martin                            | Schreiber  |                       | MD                | Oregon Health & Science University              | Portland, OR                             | Principal Investigator                                  | N/A                                                                                        |
| Thomas J                          | Schroepfel |                       | MD                | Univeristy of Colorado Health                   | Colorado Springs, CO                     | Principal Investigator                                  | N/A                                                                                        |
| Timothy J.                        | Stevens    |                       | MD                | Northeast Georgia Medical Center                | Gainesville, GA                          | Principal Investigator                                  | N/A                                                                                        |
| Jordan A.                         | Weinberg   |                       | MD                | St. Joseph's Hospital and Medical Center        | Phoenix, AZ                              | Principal Investigator                                  | N/A                                                                                        |
| Thomas M                          | Wertin     |                       | MD                | Valleywise Health Medical Center                | Phoenix, AZ                              | Principal Investigator                                  | N/A                                                                                        |
| Chad T.                           | Wilson     |                       | MD, MPH           | Baylor College of Medicine                      | Houston, TX                              | Principal Investigator                                  | N/A                                                                                        |
| Jonathan                          | Wisler     |                       | MD                | The Ohio State University Wexner Medical Center | Columbus, OH                             | Principal Investigator                                  | N/A                                                                                        |
| Khaled                            | Zreik      |                       | MD                | Sanford Health                                  | Sioux Falls, SD                          | Principal Investigator                                  | N/A                                                                                        |
