# Supplementary material for: Interactive Media-Based Approach for an Exception From Informed Consent Trial Involving Patients With Trauma
Source: PubMed Central journal article supplement (PMC11223059; doi:10.1001/jamasurg.2024.2147), 2024-07-03
Supplement: jamasurg-e242147-s003.pdf [file jamasurg-e242147-s003.pdf]

## Data Sharing Statement

Stephens. Interactive Media-Based Approach for an Exception From Informed Consent Trial Involving Patients With Trauma. *JAMA Surg*. Published July 03, 2024.  
doi:10.1001/jamasurg.2024.2147

### Data

**Data available:** No

### Additional Information

**Explanation for why data not available:** The CC/PD campaigns are ongoing and data continue to be collected from other sites.
